# Supplementary material for: New Halogen-Containing Drugs Approved by FDA in 2021: An Overview on Their Syntheses and Pharmaceutical Use
Source: MDPI journal article supplement (doi:10.3390/molecules27051643), 2022-03-02
Supplement: s1 [file s1]

# SUPPORTING INFORMATION

## New Halogen-containing drugs approved by FDA in 2021: An Overview on their Syntheses and Pharmaceutical Use

Davide Benedetto Tiz \*, Luana Bagnoli, Ornelio Rosati, Francesca Marini, Luca Sancineto and Claudio Santi \*

Group of Catalysis, Synthesis and Organic Green Chemistry, Department of Pharmaceutical Sciences, University of Perugia, Via del Liceo 1, Perugia 06100, Italy; luana.bagnoli@unipg.it (L.B.);

ornelio.rosati@unipg.it (O.R.); francesca.marini@unipg.it (F.M.); luca.sancineto@unipg.it (L.S.)

\* Correspondence: davide.benedettotiz@unipg.it (D.B.T.); claudio.santi@unipg.it (C.S.)

### Content:

|                                                                                                                         |                  |
|-------------------------------------------------------------------------------------------------------------------------|------------------|
| Alternative synthesis for tivozanib ( <b>Scheme S1</b> ).                                                               | <b>Page 2</b>    |
| Chemical structure of boroxine S9 employed in an optimized synthesis of Sotorasib ( <b>Figure S1</b> )                  | <b>Page 2</b>    |
| Alternative synthesis for the multi-kilogram production of melphalan flufenamide hydrochloric salt ( <b>Scheme S2</b> ) | <b>Page 3</b>    |
| Alternative synthesis for the synthon SI18 ( <b>Scheme S3</b> )                                                         | <b>Page 3</b>    |
| Table describing the names of the 14 halogenated molecules approved by FDA in 2021 ( <b>Table S1</b> )                  | <b>Pages 4-5</b> |

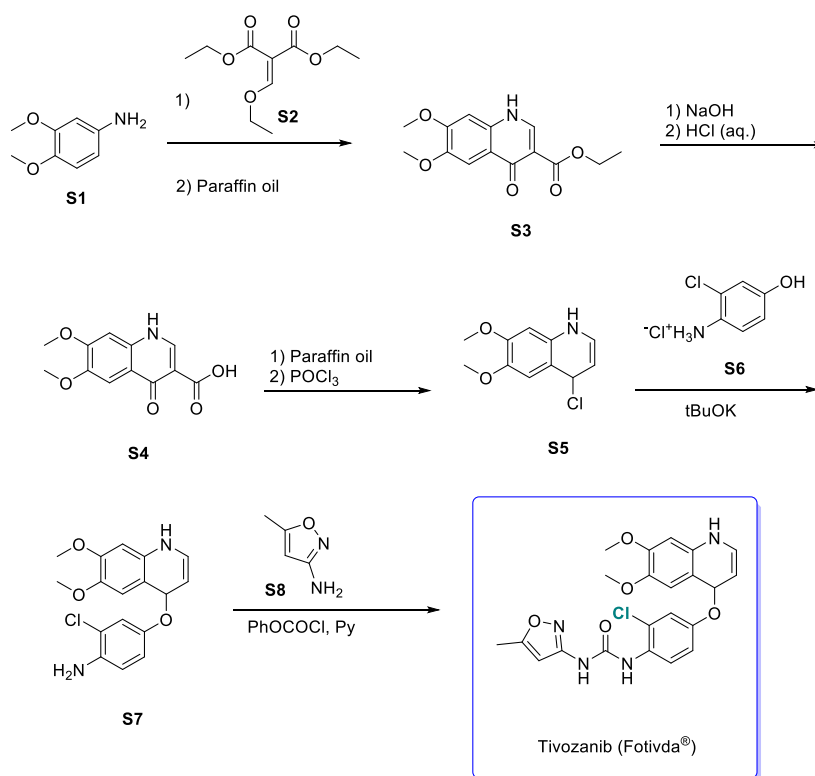

**Scheme S1.** Alternative synthesis for tivozanib [28].

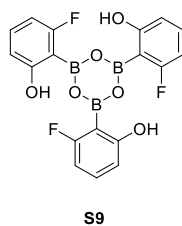

**Figure S1.** Chemical structure of boroxine **S9** employed in an optimized synthesis of Sotorasib [31].

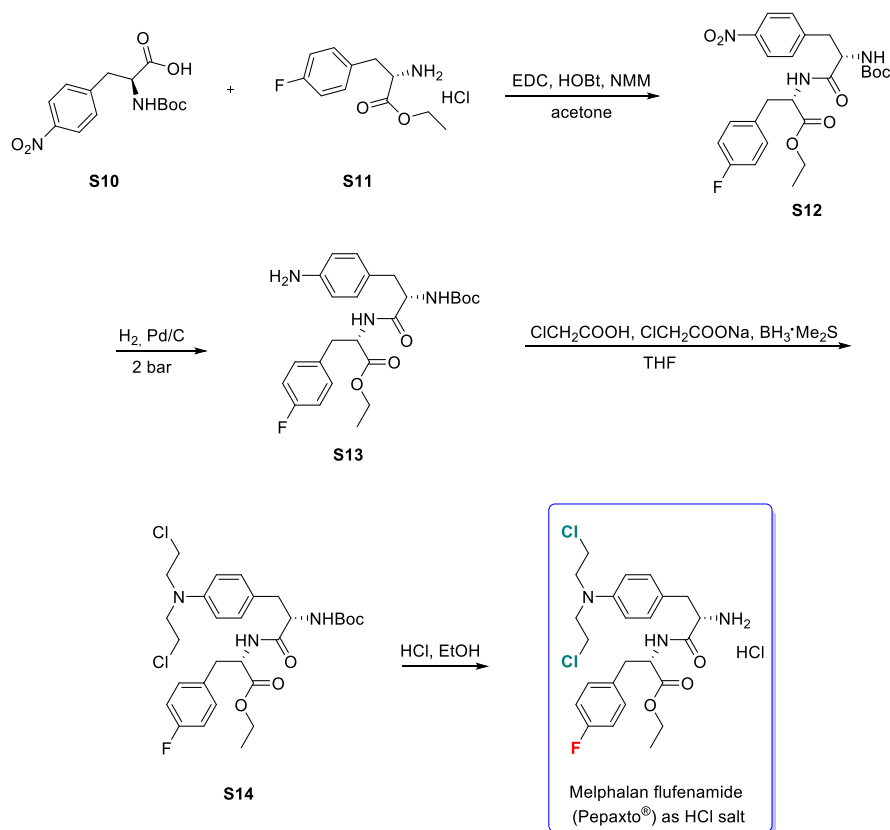

**Scheme S2.** Alternative synthesis for the multi-kilogram production of melphalan flufenamide hydrochloric salt [34].

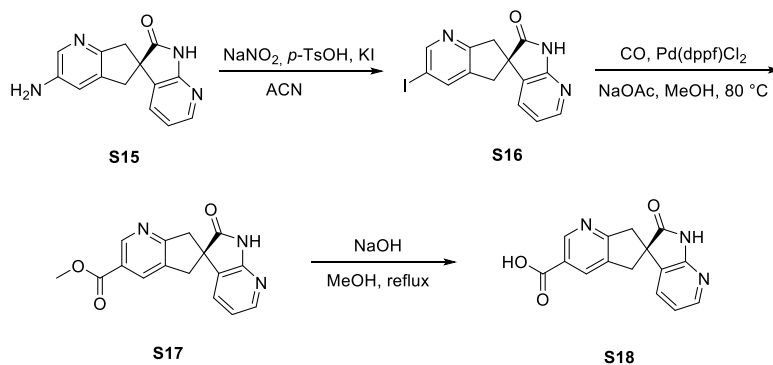

**Scheme S3.** Alternative synthesis for the synthon **S18** [77].

| Name                  | Chemical structure | IUPAC name                                                                                                                                           |
|-----------------------|--------------------|------------------------------------------------------------------------------------------------------------------------------------------------------|
| Tivozanib             |                    | 1-(2-chloro-4-((6,7-dimethoxy-1,4-dihydroquinolin-4-yl)oxy)phenyl)-3-(5-methylisoxazol-3-yl)urea                                                     |
| Sotorasib             |                    | 4-((S)-4-acryloyl-2-methylpiperazin-1-yl)-6-fluoro-7-(2-fluoro-6-hydroxyphenyl)-1-(2-isopropyl-4-methylpyridin-3-yl)pyrido[2,3-d]pyrimidin-2(1H)-one |
| Melphalan flufenamide |                    | ethyl (S)-2-((S)-2-amino-3-(4-(bis(2-chloroethyl)amino)phenyl)propanamido)-3-(4-fluorophenyl)propanoate (HCl salt)                                   |
| Asciminib             |                    | (R)-N-(4-(chlorodifluoromethoxy)phenyl)-6-(3-hydroxypyrrolidin-1-yl)-5-(1H-pyrazol-5-yl)nicotinamide                                                 |
| Infigratinib          |                    | 3-(2,6-dichloro-3,5-dimethoxyphenyl)-1-(6-((4-ethylpiperazin-1-yl)phenyl)amino)pyrimidin-4-yl)-1-methylurea                                          |
| Umbralisib            |                    | 2-(1-(4-amino-3-(3-fluoro-4-isopropoxyphenyl))-1H-pyrazolo[3,4-d]pyrimidin-1-yl)ethyl)-6-fluoro-3-(3-fluorophenyl)-4H-chromen-4-one                  |
| Piflufolastat F-18    |                    | ((S)-1-carboxy-5-(6-(fluoro-18F)nicotinamido)pentyl)carbamoyl)-L-glutamic acid                                                                       |
| Belzutifan            |                    | 3-(((1S,2S,3R)-2,3-difluoro-1-hydroxy-7-(methylsulfonyl)-2,3-dihydro-1H-inden-4-yl)oxy)-5-fluorobenzonitrile                                         |
| Cabotegavir           |                    | (3S,11aR)-N-(2,4-difluorobenzyl)-6-hydroxy-3-methyl-5,7-dioxo-2,3,5,7,11,11a-hexahydrooxazolo[3,2-a]pyrido[1,2-d]pyrazine-8-carboxamide              |

|                   |                                                                                    |                                                                                                                                                                                                      |
|-------------------|------------------------------------------------------------------------------------|------------------------------------------------------------------------------------------------------------------------------------------------------------------------------------------------------|
| <b>Maribavir</b>  | 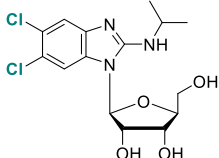  | (2S,3S,4R,5S)-2-(5,6-dichloro-2-(isopropylamino)-1H-benzo[d]imidazol-1-yl)-5-(hydroxymethyl)tetrahydrofuran-3,4-diol                                                                                 |
| <b>Ponesimod</b>  |   | (Z)-5-((Z)-3-chloro-4-((R)-2,3-dihydroxypropoxy)benzylidene)-2-(propylimino)-3-(o-tolyl)thiazolidin-4-one                                                                                            |
| <b>Atogepant</b>  |   | (S)-N-((3S,5S,6R)-6-methyl-2-oxo-1-(2,2,2-trifluoroethyl)-5-(2,3,6-trifluorophenyl)piperidin-3-yl)-2'-oxo-1',2',5,7-tetrahydrospiro[cyclopenta[b]pyridine-6,3'-pyrrolo[2,3-b]pyridine]-3-carboxamide |
| <b>Avacopan</b>   |   | (2R,3S)-2-(4-(cyclopentylamino)phenyl)-1-(2-fluoro-6-methylbenzoyl)-N-(4-methyl-3-(trifluoromethyl)phenyl)piperidine-3-carboxamide                                                                   |
| <b>Vericiguat</b> |  | methyl (4,6-diamino-2-(5-fluoro-1-(2-fluorobenzyl)-1H-pyrazolo[3,4-b]pyridin-3-yl)pyrimidin-5-yl)carbamate                                                                                           |

**Table S1.** Table describing the names of the 14 halogenated molecules approved by FDA in 2021. Their structures and IUPAC names are provided as well.
